# Supplementary material for: Pt Nanoparticles with High Oxidase-Like Activity and Reusability for Detection of Ascorbic Acid
Source: PubMed Central journal article supplement (PMC7352317; doi:10.3390/nano10061015), 2020-05-26
Supplement: nanomaterials-10-01015-s001.pdf [file nanomaterials-10-01015-s001.pdf]

## Supplementary Information

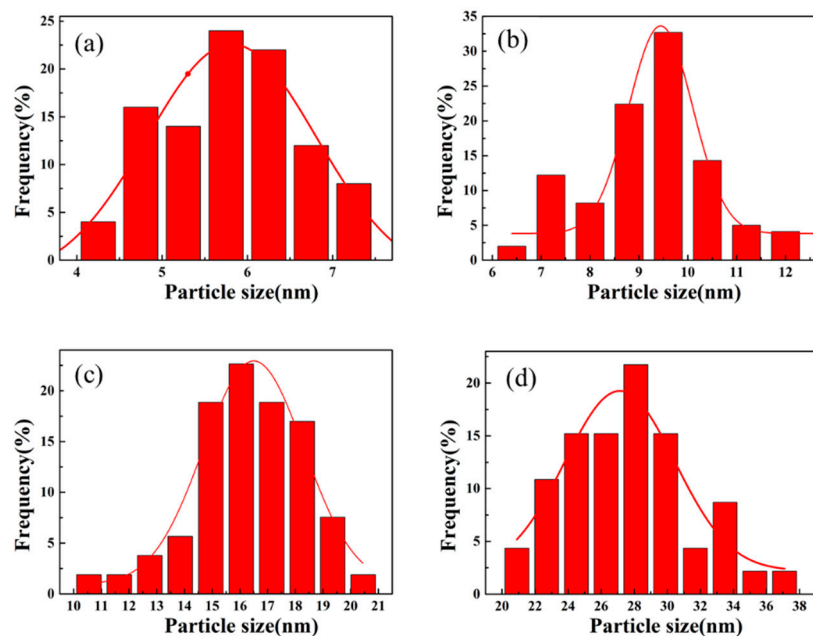

**Figure S1** Size distributions of (a) Pt-0 HCl, (b) Pt-3.7 HCl, (c) Pt-9.25 HCl and (d) Pt-2 PVP.

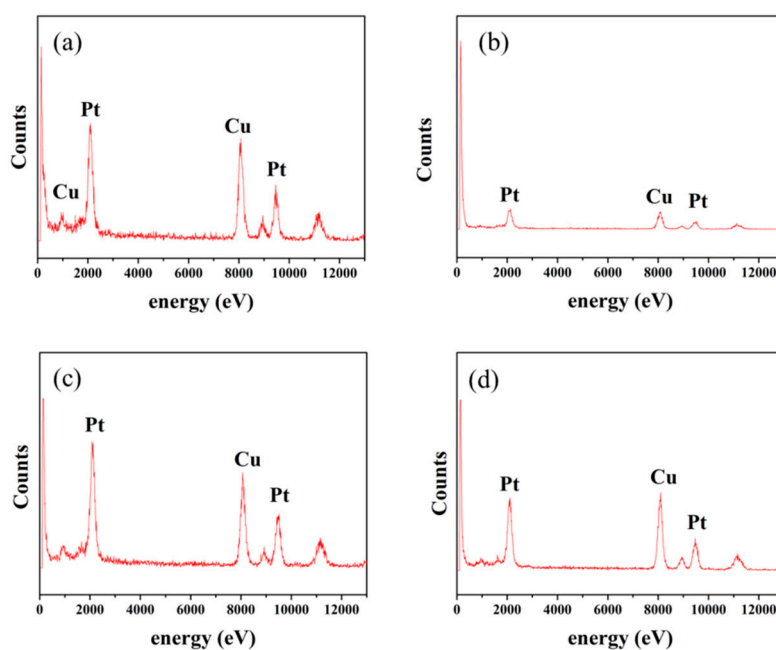

**Figure S2** EDS elemental analysis of (a) Pt-0 HCl, (b) Pt-3.7 HCl, (c) Pt-9.25 HCl and (d) Pt-2 PVP.

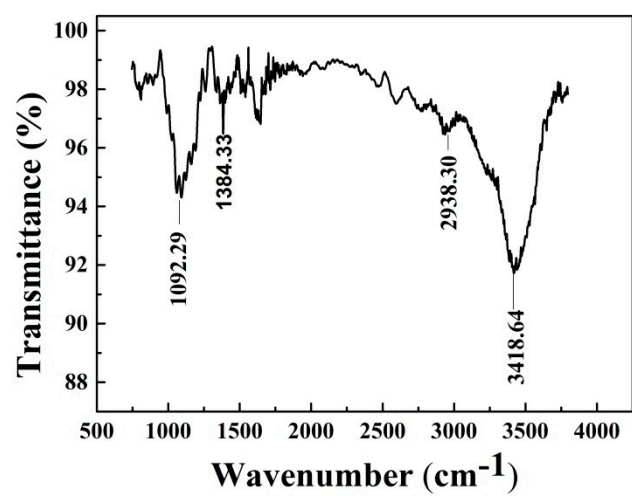

Fig. S3 FTIR spectra of Pt NPs.

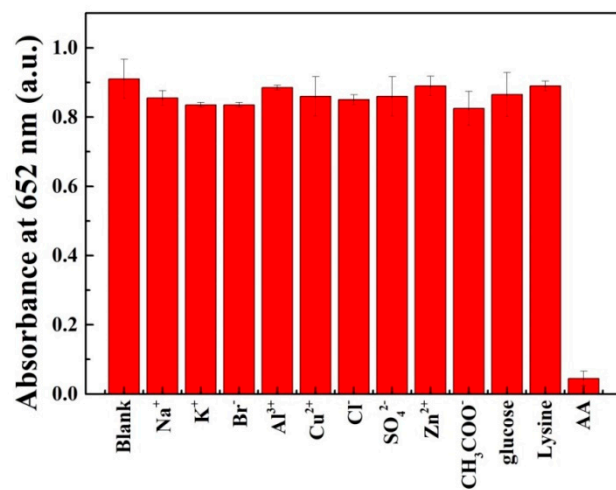

Figure S4 Interference of different interfering substances in the AA detection, all interfering substances were at a concentration of 25  $\mu$ M.

**Table S1** Comparative table of steady-state kinetic parameter for Pt NPs and other materials

| Catalyst                            | Substrate | Km (mM) | Ref.      |
|-------------------------------------|-----------|---------|-----------|
| Hg <sup>2+</sup> /citrate-AgNPs     |           | 0.23    | [1]       |
| CS-SeNPs                            |           | 0.852   | [2]       |
| NiCo <sub>2</sub> O <sub>4</sub> MS |           | 0.127   | [3]       |
| Lysozyme-Pt NPs                     | TMB       | 0.63    | [4]       |
| Ni/Pd hollow NPs                    |           | 0.11    | [5]       |
| Cu-Ag/rGO                           |           | 0.634   | [6]       |
| Fe <sub>3</sub> O <sub>4</sub> @C   |           | 0.38    | [7]       |
| Pt NPs                              |           | 0.102   | This work |

## References.

1. Wang, G.-L.; Xu, X.-F.; Cao, L.-H.; He, C.-H.; Li, Z.-J.; Zhang, C. Mercury(II)-stimulated oxidase mimetic activity of silver nanoparticles as a sensitive and selective mercury(II) sensor. *Rsc Advances* 2014, 4, 5867-5872, doi:10.1039/c3ra45226c.
2. Cao, H.; Xiao, J.; Liu, H. Enhanced oxidase-like activity of selenium nanoparticles stabilized by chitosan and application in a facile colorimetric assay for mercury (II). *Biochemical Engineering Journal* 2019, 152, doi:10.1016/j.bej.2019.107384.
3. Su, L.; Dong, W.; Wu, C.; Gong, Y.; Zhang, Y.; Li, L.; Mao, G.; Feng, S. The peroxidase and oxidase-like activity of NiCo<sub>2</sub>O<sub>4</sub> mesoporous spheres: Mechanistic understanding and colorimetric biosensing. *Analytica Chimica Acta* 2017, 951, 124-132, doi:10.1016/j.aca.2016.11.035.
4. Yu, C.-J.; Chen, T.-H.; Jiang, J.-Y.; Tseng, W.-L. Lysozyme-directed synthesis of platinum nanoclusters as a mimic oxidase. *Nanoscale* 2014, 6, 9618-9624, doi:10.1039/c3nr06896j.
5. Wang, Q.; Zhang, L.; Shang, C.; Zhang, Z.; Dong, S. Triple-enzyme mimetic activity of nickel-palladium hollow nanoparticles and their application in colorimetric biosensing of glucose. *Chemical Communications* 2016, 52, 5410-5413, doi:10.1039/c6cc00194g.
6. Darabdhara, G.; Sharma, B.; Das, M.R.; Boukherroub, R.; Szunerits, S. Cu-Ag bimetallic nanoparticles on reduced graphene oxide nanosheets as peroxidase mimic for glucose and ascorbic acid detection. *Sensors and Actuators B-Chemical* 2017, 238, 842-851, doi:10.1016/j.snb.2016.07.106.
7. An, Q.; Sun, C.; Li, D.; Xu, K.; Guo, J.; Wang, C. Peroxidase-Like Activity of Fe<sub>3</sub>O<sub>4</sub>@Carbon Nanoparticles Enhances Ascorbic Acid-Induced Oxidative Stress and Selective Damage to PC-3

Prostate Cancer Cells. *Acs Applied Materials & Interfaces* 2013, 5, 13248-13257,  
doi:10.1021/am4042367.
